# Supplementary material
Source: PubMed Central journal article supplement (PMC3982742)
Supplement: supp_pp.113.231688_231688supp.pdf [file supp_pp.113.231688_231688supp.pdf]

Supplemental tables and figures for “Polarity of water transport across epidermal cell membranes in *Tradescantia virginiana*.”

**Table S1. Examples of statistical results for the parameters of the individual fit curves in the supplemental data.**

Estimates, approximate SE and 95% confidence limits for the pressure clamp shown in Fig. S1 (using Eq. 8, but note that parameter  $c$  is used here simply to fit the model to  $V$  rather than  $\Delta V$ ). Note also that  $1/b$  is the parameter estimated because it is directly proportional to  $T_{1/2}$ , with units of seconds.

$$\Delta V^c(t) = a \cdot e^{(-b \cdot t)} \quad (\text{Eq. 8})$$

| Parameter  | Estimate | Approx Std Error | Approximate 95% Confidence Limits |          |
|------------|----------|------------------|-----------------------------------|----------|
| <b>a</b>   | -33347.0 | 62.3709          | -33469.3                          | -33224.7 |
| <b>1/b</b> | 55.60    | 2.3              | 55.1575                           | 56.0434  |
| <b>c</b>   | 39926.5  | 27.7481          | 39872.1                           | 39980.9  |

For the pressure relaxation shown in Fig. S2.

$$P_{cell}(t) = a \cdot e^{(-b \cdot t)} + c \quad (\text{Eq. 3})$$

| Parameter  | Estimate | Approx Std Error | Approximate 95% Confidence Limits |        |
|------------|----------|------------------|-----------------------------------|--------|
| <b>a</b>   | 5.2989   | 0.4412           | 4.4330                            | 6.1648 |
| <b>1/b</b> | 1.95     | 0.07             | 1.808                             | 2.093  |
| <b>c</b>   | 5.9957   | 0.00159          | 5.9926                            | 5.9988 |

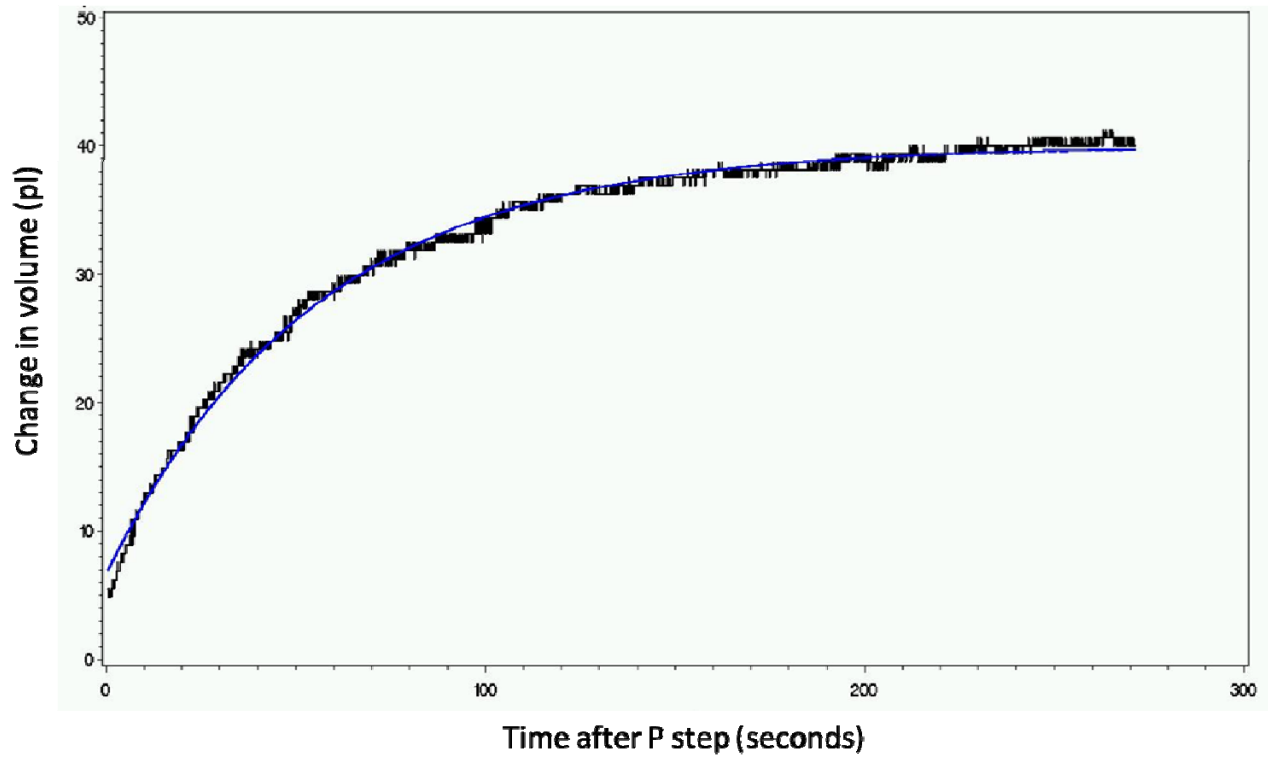

Figure S1. Example Pressure Clamp (PC) data, showing an exponential fit (solid blue line) to the raw data (black line) of the observed change in fluid volume within the capillary over time after the  $P$  step was made. Also shown, but hidden by the fit line, are the 95% confidence limits for the fit line (blue dash line).

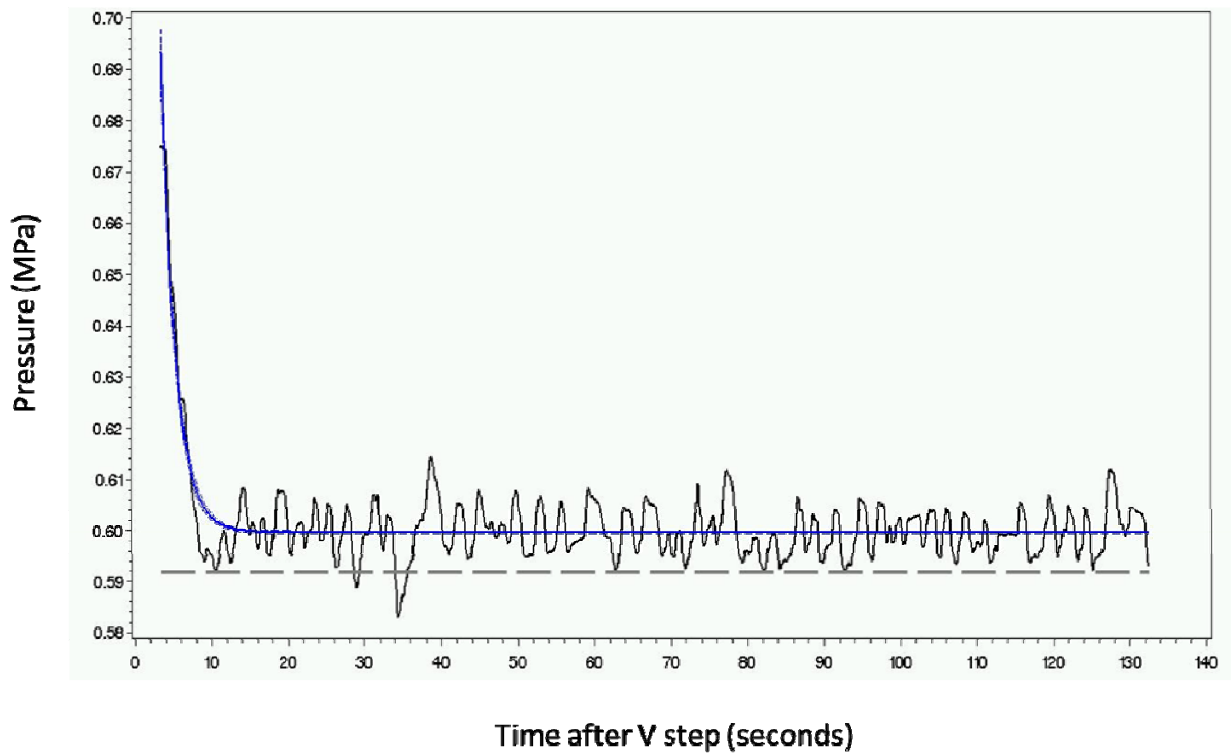

Figure S2. Example Pressure Relaxation (PR) data, showing an exponential fit (solid blue line) to the raw data (black line) of the observed change in  $P_{oil}$  over time after the  $V$  step was made. Also shown are the 95% confidence limits for the fit line (blue dash line), and the stable pressure prior to the change in  $V$  (grey dash line). .

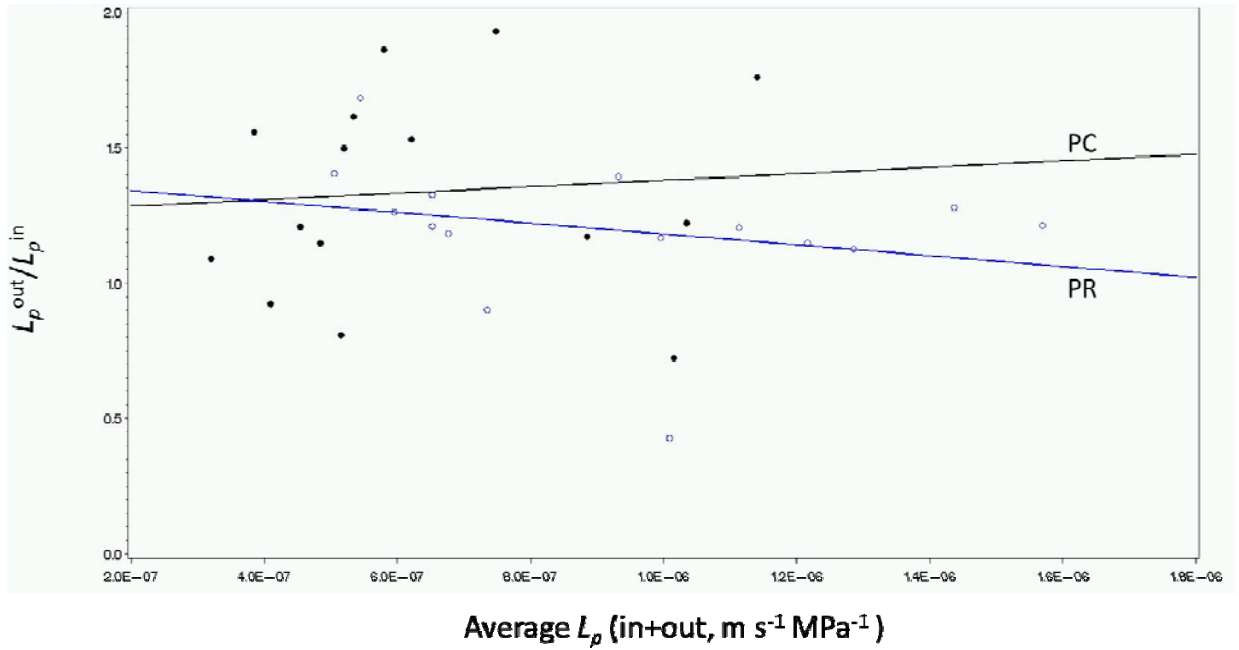

Figure S3. Lack of relation between the  $L_p^{out}/L_p^{in}$  ratio and the average  $L_p$  for each of the 15 cells shown in Table 2, using either the PC (black filled circles and regression line) or the PR (blue circles and regression line) method.
